# Supplementary material for: Association of Extracellular Vesicle Protein Cargo with Race and Clinical Markers of Mortality
Source: PubMed Central journal article supplement (PMC6879565; doi:10.1038/s41598-019-53640-1), 2019-11-26

## **Supplementary Information: Figures S1,S2**

### **Association of Extracellular Vesicle Protein Cargo with Race and Clinical Markers of Mortality**

Nicole Noren Hooten, Minna H. McFarland, David W. Freeman, Nicolle A. Mode, Ngozi Ezike, Alan B. Zonderman, and Michele K. Evans

#### **Supplementary Figure Legends**

**Supplementary Figure 1. Significant interactions of EV proteins and various markers of mortality and race.** Linear regression was used to analyze each EV protein on the interaction of (A) LDH, (B) MAP, (C) ALP, (D) cholesterol, (E) MCV, and race. *P* values for the interactions ( $P_i$ ) and the  $R^2$  for the model ( $R^2_m$ ) are indicated. Solid lines=African Americans (AfrAm) and dashed lines=whites.

**Supplementary Figure 2. Full immunoblots for EV markers.** Two EV-depleted samples as negative controls, cell lysate, and plasma EV samples were lysed with MPER, analyzed by SDS-PAGE and probed for the known EV markers CD9 and Flotillin1 (Flot1) and the purity markers GM130 and Apolipoprotein A1 (ApoA1). MW, molecular weight

# Suppl. Figure 1

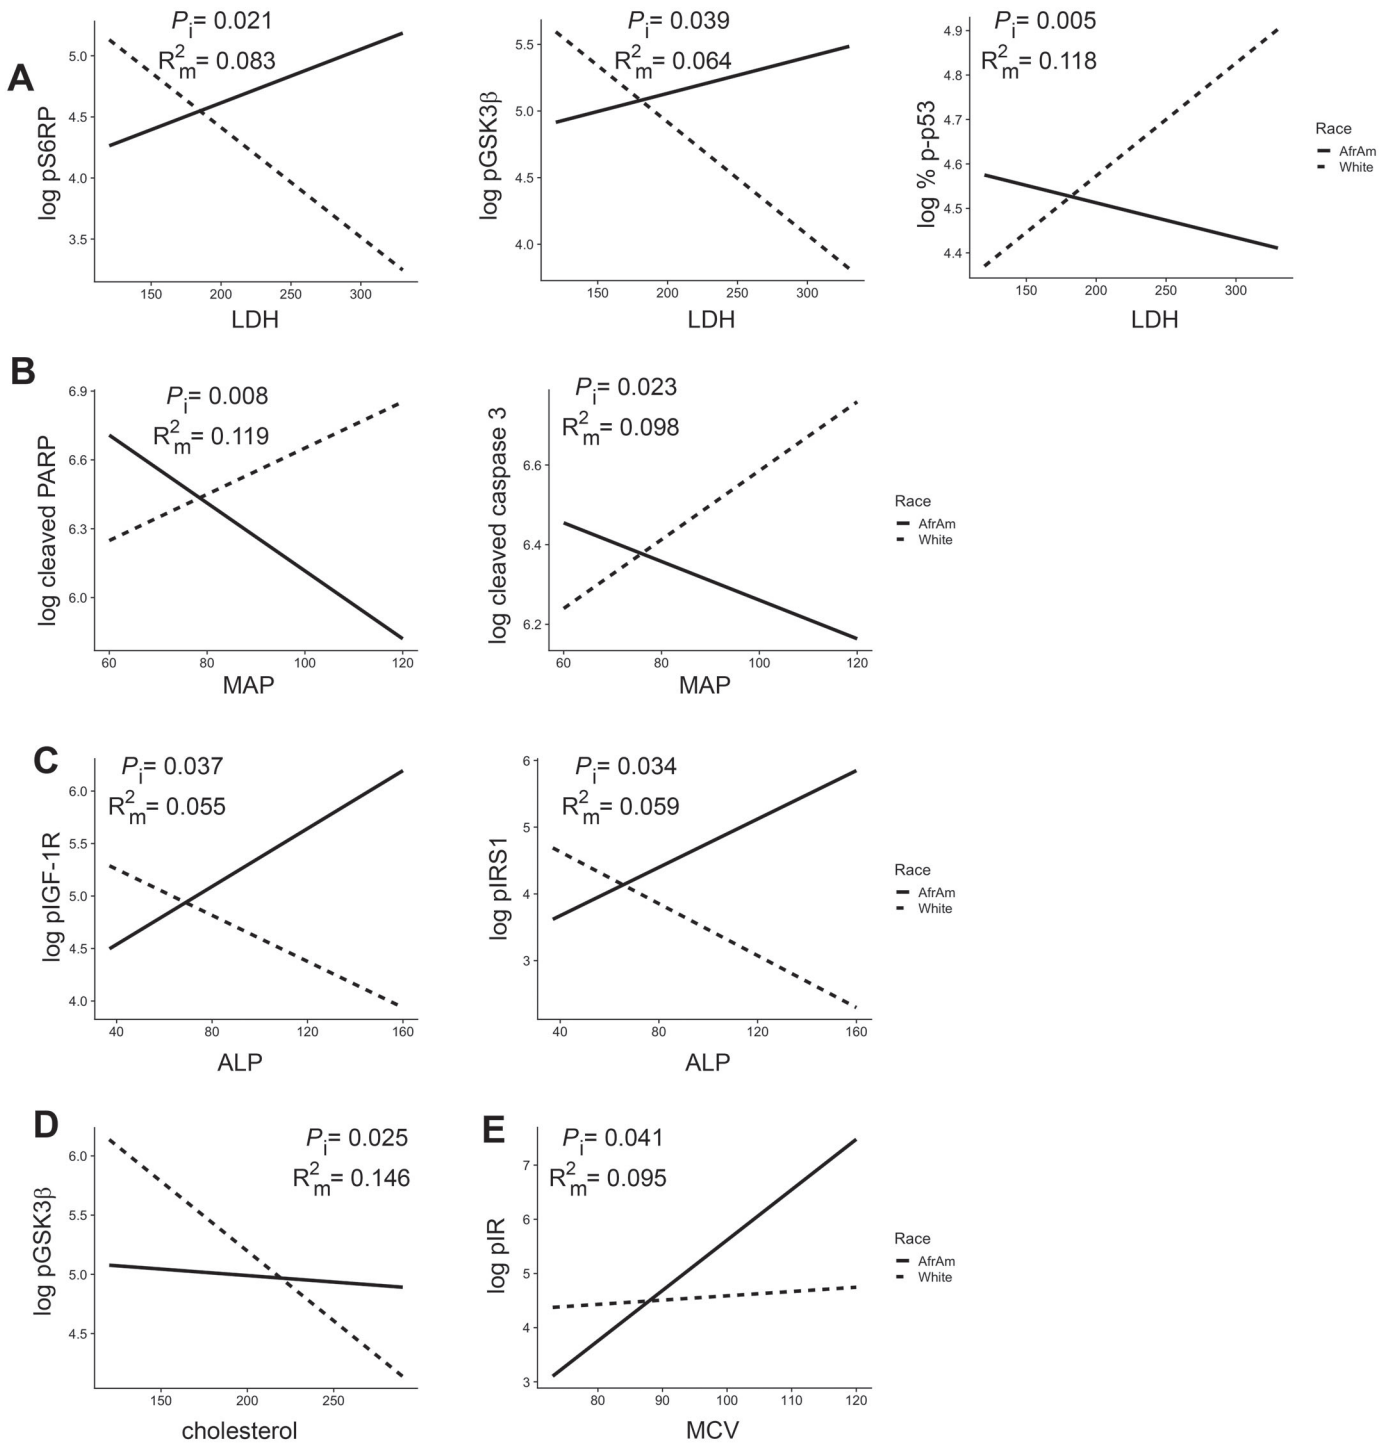

Supp. Figure 2

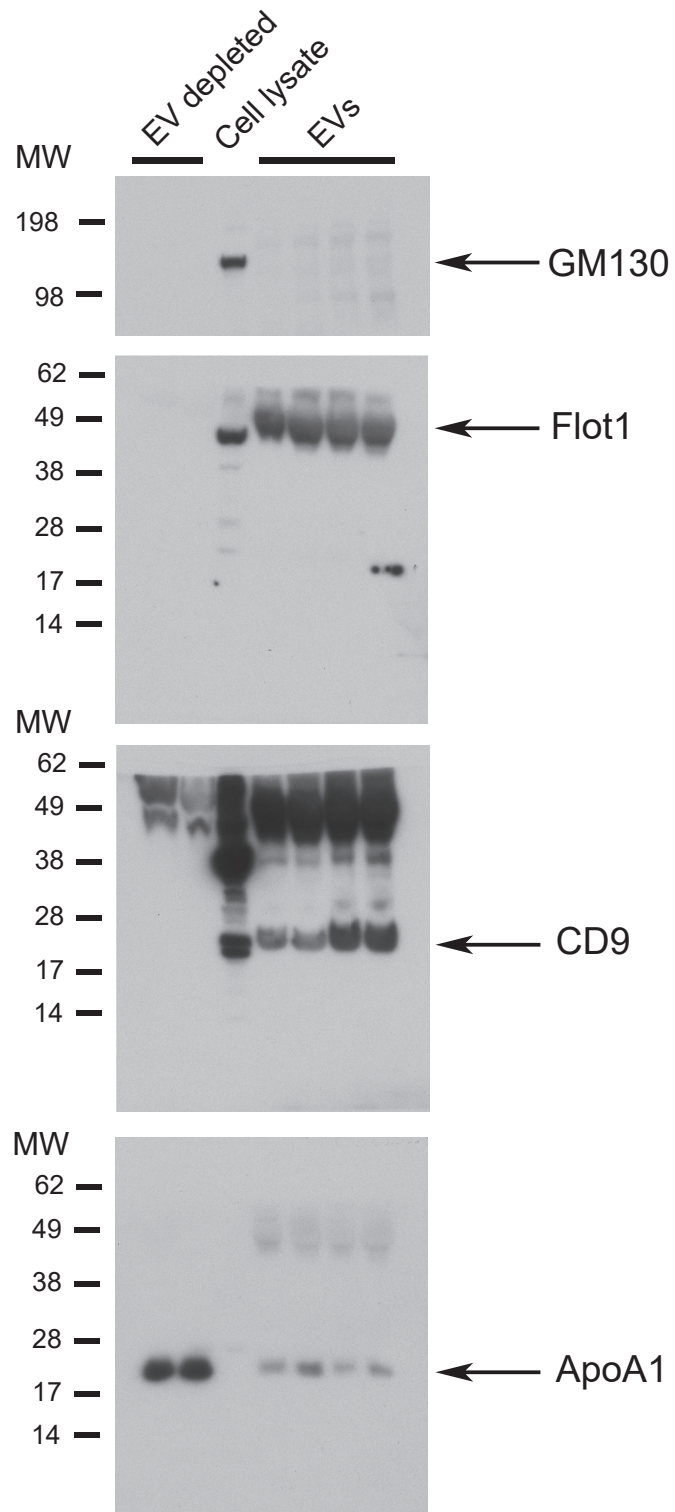

Supplement: 41598_2019_53640_MOESM1_ESM.pdf [file 41598_2019_53640_MOESM1_ESM.pdf]
